# Supplementary material
Source: publisher figshare collection journal article supplement (https://acs.figshare.com/ndownloader/files/4096423)
Supplement: Supplementary file 1 [file 4096423]

data_n1997
_audit_creation_date              2012-06-27
_audit_creation_method
;
  Olex2 1.2
  (compiled May  9 2012 12:37:22, GUI svn.r4230)
;
_publ_contact_author_address      ?
_publ_contact_author_email        ?
_publ_contact_author_name         ''
_publ_contact_author_phone        ?
_chemical_name_common             ?
_chemical_name_systematic
;
 ? 
;
_chemical_formula_moiety
'C48 H40 N4, 0.5(C18 H12), 2(C7 H8), 4(F6 P), 2(C2 H3 N)'
_chemical_formula_sum             'C75 H68 F24 N6 P4'
_chemical_formula_weight          1633.23
_chemical_melting_point           ?
loop_
  _atom_type_symbol
  _atom_type_description
  _atom_type_scat_dispersion_real
  _atom_type_scat_dispersion_imag
  _atom_type_scat_source
 'C' 'C' 0.0181 0.0091 'International Tables Vol C Tables 4.2.6.8 and 6.1.1.4'
 'H' 'H' 0.0000 0.0000 'International Tables Vol C Tables 4.2.6.8 and 6.1.1.4'
 'F' 'F' 0.0727 0.0534 'International Tables Vol C Tables 4.2.6.8 and 6.1.1.4'
 'N' 'N' 0.0311 0.0180 'International Tables Vol C Tables 4.2.6.8 and 6.1.1.4'
 'P' 'P' 0.2955 0.4335 'International Tables Vol C Tables 4.2.6.8 and 6.1.1.4'

_space_group_crystal_system       'triclinic'
_space_group_IT_number            2
_space_group_name_H-M_alt         'P -1'
_space_group_name_Hall            '-P 1'
loop_
  _space_group_symop_id
  _space_group_symop_operation_xyz
 1 'x, y, z'
 2 '-x, -y, -z'

_cell_length_a                    10.1400(3)
_cell_length_b                    11.2521(3)
_cell_length_c                    17.9440(5)
_cell_angle_alpha                 72.2804(17)
_cell_angle_beta                  86.5349(17)
_cell_angle_gamma                 65.8180(15)
_cell_volume                      1774.21(9)
_cell_formula_units_Z             1
_cell_measurement_reflns_used     5617
_cell_measurement_temperature     105(2)
_cell_measurement_theta_max       63.87
_cell_measurement_theta_min       2.59
_exptl_absorpt_coefficient_mu     1.989
_exptl_absorpt_correction_T_max   0.7525
_exptl_absorpt_correction_T_min   0.6011
_exptl_absorpt_correction_type    multi-scan
_exptl_absorpt_process_details
;
SADABS-2008/1 (Bruker,2008) was used for absorption correction.
wR2(int) was 0.0561 before and 0.0308 after correction.
The Ratio of minimum to maximum transmission is 0.7988.
The \l/2 correction factor is 0.0015.
;
_exptl_crystal_colour             'red'
_exptl_crystal_density_diffrn     1.529
_exptl_crystal_density_meas       .
_exptl_crystal_density_method     'not measured'
_exptl_crystal_description        'block'
_exptl_crystal_F_000              836
_exptl_crystal_size_max           0.468
_exptl_crystal_size_mid           0.162
_exptl_crystal_size_min           0.071
_exptl_special_details
;
 ? 
;
_diffrn_reflns_av_R_equivalents   0.0180
_diffrn_reflns_av_unetI/netI      0.0265
_diffrn_reflns_limit_h_max        4
_diffrn_reflns_limit_h_min        -11
_diffrn_reflns_limit_k_max        12
_diffrn_reflns_limit_k_min        -13
_diffrn_reflns_limit_l_max        20
_diffrn_reflns_limit_l_min        -20
_diffrn_reflns_number             9607
_diffrn_reflns_theta_full         64.30
_diffrn_reflns_theta_max          64.30
_diffrn_reflns_theta_min          2.59
_diffrn_ambient_temperature       105.36
_diffrn_detector_area_resol_mean  8
_diffrn_measured_fraction_theta_full 0.952
_diffrn_measured_fraction_theta_max 0.952
_diffrn_measurement_device_type   'Bruker Kappa APEX2 CCD area detector'
_diffrn_measurement_method        '\w and \f scans'
_diffrn_radiation_monochromator   'Quazar optics'
_diffrn_radiation_type            CuK\a
_diffrn_radiation_wavelength      1.54178
_diffrn_source                    microsource
_diffrn_standards_number          0
_reflns_number_gt                 4851
_reflns_number_total              5636
_reflns_threshold_expression      >2sigma(I)
_computing_cell_refinement        'SAINT V7.23A (Bruker, 2005)'
_computing_data_collection        'APEX2 V2.1-4 (Bruker, 2007)'
_computing_data_reduction         'Bruker SAINT'
_computing_molecular_graphics
;
O. V. Dolomanov, L. J. Bourhis, R. J. Gildea, J. A. K. Howard and H. Puschmann,
OLEX2: a complete structure solution, refinement and analysis program.
J. Appl. Cryst. (2009). 42, 339-341.
;
_computing_publication_material
;
O. V. Dolomanov, L. J. Bourhis, R. J. Gildea, J. A. K. Howard and H. Puschmann,
OLEX2: a complete structure solution, refinement and analysis program.
J. Appl. Cryst. (2009). 42, 339-341.
;
_computing_structure_refinement
;
XL, G.M. Sheldrick, Acta Cryst.
(2008). A64, 112-122
;
_computing_structure_solution
;
XS, G.M. Sheldrick, Acta Cryst.
(2008). A64, 112-122
;
_refine_diff_density_max          0.741
_refine_diff_density_min          -0.439
_refine_diff_density_rms          0.075
_refine_ls_extinction_coef        ?
_refine_ls_extinction_method      none
_refine_ls_goodness_of_fit_ref    1.052
_refine_ls_hydrogen_treatment     constr
_refine_ls_matrix_type            full
_refine_ls_number_parameters      691
_refine_ls_number_reflns          5636
_refine_ls_number_restraints      692
_refine_ls_R_factor_all           0.0736
_refine_ls_R_factor_gt            0.0647
_refine_ls_restrained_S_all       1.127
_refine_ls_shift/su_max           0.016
_refine_ls_shift/su_mean          0.001
_refine_ls_structure_factor_coef  Fsqd
_refine_ls_weighting_details
'calc w=1/[\s^2^(Fo^2^)+(0.1070P)^2^+2.5953P] where P=(Fo^2^+2Fc^2^)/3'
_refine_ls_weighting_scheme       calc
_refine_ls_wR_factor_gt           0.1766
_refine_ls_wR_factor_ref          0.1889
_refine_special_details
;
 Rigid bond restraints were imposed on the displacement parameters as well
 as restraints on similar amplitudes  separated by less than 1.7 Ang. on the 
 disorxdered toluene and PF6 molecules. Distance restraints were refined for
 the disordered PF6 molecules and an idealized 6-membered ring was constrained
 for the disordered toluene molecule.
 
 Refinement of F^2^ against ALL reflections.  The weighted R-factor wR and 
 goodness of fit S are based on F^2^, conventional R-factors R are based 
 on F, with F set to zero for negative F^2^. The threshold expression of 
 F^2^ > 2sigma(F^2^) is used only for calculating R-factors(gt) etc. and is 
 not relevant to the choice of reflections for refinement.  R-factors based 
 on F^2^ are statistically about twice as large as those based on F, and R- 
 factors based on ALL data will be even larger. 
;
_atom_sites_solution_hydrogens    geom
_atom_sites_solution_primary      direct
_atom_sites_solution_secondary    difmap
loop_
  _atom_site_label
  _atom_site_type_symbol
  _atom_site_fract_x
  _atom_site_fract_y
  _atom_site_fract_z
  _atom_site_U_iso_or_equiv
  _atom_site_adp_type
  _atom_site_occupancy
  _atom_site_symmetry_multiplicity
  _atom_site_calc_flag
  _atom_site_refinement_flags
  _atom_site_disorder_assembly
  _atom_site_disorder_group
 N1 N 0.5905(3) 1.0098(3) 0.12894(15) 0.0282(6) Uani 1 1 d . . .
 N2 N 0.4465(3) 0.4923(3) 0.75554(15) 0.0250(6) Uani 1 1 d . . .
 C1 C 0.4294(3) 0.4427(3) 0.84170(18) 0.0280(7) Uani 1 1 d . . .
 H1A H 0.5138 0.3562 0.8668 0.034 Uiso 1 1 calc R . .
 H1B H 0.3408 0.4249 0.8497 0.034 Uiso 1 1 calc R . .
 C2 C 0.5713(4) 0.5019(4) 0.7326(2) 0.0322(7) Uani 1 1 d . . .
 H2 H 0.6487 0.4717 0.7707 0.039 Uiso 1 1 calc R . .
 C3 C 0.5880(4) 0.5549(4) 0.6548(2) 0.0350(8) Uani 1 1 d . . .
 H3 H 0.6771 0.5609 0.6399 0.042 Uiso 1 1 calc R . .
 C4 C 0.4776(3) 0.6001(3) 0.59739(18) 0.0265(7) Uani 1 1 d . . .
 C5 C 0.3493(4) 0.5888(3) 0.62367(19) 0.0313(7) Uani 1 1 d . . .
 H5 H 0.2702 0.6184 0.5868 0.038 Uiso 1 1 calc R . .
 C6 C 0.3361(3) 0.5354(3) 0.70224(19) 0.0304(7) Uani 1 1 d . . .
 H6 H 0.2479 0.5290 0.7190 0.036 Uiso 1 1 calc R . .
 C7 C 0.4957(3) 0.6600(3) 0.51364(18) 0.0269(7) Uani 1 1 d . . .
 C8 C 0.6244(4) 0.6696(5) 0.4913(2) 0.0499(11) Uani 1 1 d . . .
 H8 H 0.7027 0.6331 0.5297 0.060 Uiso 1 1 calc R . .
 C9 C 0.6421(4) 0.7306(4) 0.4146(2) 0.0510(11) Uani 1 1 d . . .
 H9 H 0.7322 0.7358 0.4015 0.061 Uiso 1 1 calc R . .
 C10 C 0.5319(3) 0.7846(3) 0.35630(18) 0.0262(7) Uani 1 1 d . . .
 C11 C 0.4048(4) 0.7713(5) 0.3783(2) 0.0472(10) Uani 1 1 d . . .
 H11 H 0.3277 0.8043 0.3396 0.057 Uiso 1 1 calc R . .
 C12 C 0.3874(5) 0.7110(5) 0.4555(2) 0.0534(12) Uani 1 1 d . . .
 H12 H 0.2978 0.7047 0.4687 0.064 Uiso 1 1 calc R . .
 C13 C 0.5517(3) 0.8574(3) 0.27550(18) 0.0272(7) Uani 1 1 d . . .
 C14 C 0.6894(4) 0.8326(4) 0.2475(2) 0.0350(8) Uani 1 1 d . . .
 H14 H 0.7723 0.7609 0.2790 0.042 Uiso 1 1 calc R . .
 C15 C 0.7061(4) 0.9098(4) 0.1755(2) 0.0350(8) Uani 1 1 d . . .
 H15 H 0.8006 0.8926 0.1581 0.042 Uiso 1 1 calc R . .
 C16 C 0.4562(4) 1.0326(3) 0.15264(19) 0.0314(7) Uani 1 1 d . . .
 H16 H 0.3749 1.1010 0.1185 0.038 Uiso 1 1 calc R . .
 C17 C 0.4342(4) 0.9594(3) 0.22486(19) 0.0311(7) Uani 1 1 d . . .
 H17 H 0.3383 0.9783 0.2405 0.037 Uiso 1 1 calc R . .
 C18 C 0.6110(4) 1.1048(3) 0.05462(18) 0.0310(7) Uani 1 1 d . . .
 H18A H 0.5351 1.1298 0.0135 0.037 Uiso 1 1 calc R . .
 H18B H 0.7069 1.0596 0.0356 0.037 Uiso 1 1 calc R . .
 C19 C 0.6012(3) 1.2314(3) 0.07171(17) 0.0276(7) Uani 1 1 d . . .
 C20 C 0.4672(3) 1.3390(3) 0.06920(18) 0.0286(7) Uani 1 1 d . . .
 H20 H 0.3821 1.3383 0.0503 0.034 Uiso 1 1 calc R . .
 C21 C 0.4575(3) 1.4472(3) 0.09426(18) 0.0272(7) Uani 1 1 d . . .
 H21 H 0.3657 1.5201 0.0926 0.033 Uiso 1 1 calc R . .
 C22 C 0.5816(3) 1.4494(3) 0.12186(17) 0.0259(7) Uani 1 1 d . . .
 C23 C 0.7160(4) 1.3451(3) 0.12060(19) 0.0322(7) Uani 1 1 d . . .
 H23 H 0.8017 1.3480 0.1370 0.039 Uiso 1 1 calc R . .
 C24 C 0.7256(4) 1.2370(4) 0.0956(2) 0.0328(8) Uani 1 1 d . . .
 H24 H 0.8178 1.1665 0.0947 0.039 Uiso 1 1 calc R . .
 C25 C 0.0645(12) 0.9746(10) 0.6254(6) 0.053(2) Uani 0.50 1 d PU . 1
 H25 H -0.0326 0.9831 0.6291 0.064 Uiso 0.50 1 calc PR . 1
 C26 C 0.1092(10) 1.0287(9) 0.5545(5) 0.0532(18) Uani 0.50 1 d PU A 1
 H26 H 0.0404 1.0788 0.5104 0.064 Uiso 0.50 1 calc PR A 1
 C27 C 0.2582(10) 1.0117(8) 0.5449(5) 0.0415(17) Uani 0.50 1 d PU . 1
 C28 C 0.3051(9) 1.0587(7) 0.4743(4) 0.0397(15) Uani 0.50 1 d PU B 1
 H28 H 0.2376 1.1075 0.4297 0.048 Uiso 0.50 1 calc PR B 1
 C29 C 0.4496(8) 1.0374(6) 0.4655(4) 0.0325(13) Uani 0.50 1 d PU . 1
 C30 C 0.4988(9) 1.0853(7) 0.3933(4) 0.0373(14) Uani 0.50 1 d PU C 1
 H30 H 0.4326 1.1329 0.3481 0.045 Uiso 0.50 1 calc PR C 1
 C31 C 0.6423(10) 1.0648(7) 0.3862(4) 0.0404(15) Uani 0.50 1 d PU . 1
 C32 C 0.6988(12) 1.1138(10) 0.3126(5) 0.0443(19) Uani 0.50 1 d PU D 1
 H32 H 0.6339 1.1619 0.2669 0.053 Uiso 0.50 1 calc PR D 1
 C33 C 0.8359(12) 1.0950(10) 0.3058(6) 0.053(2) Uani 0.50 1 d PU . 1
 H33 H 0.8684 1.1271 0.2560 0.063 Uiso 0.50 1 calc PR . 1
 C36 C 1.0015(11) 0.5866(9) 0.5314(6) 0.0415(19) Uani 0.50 1 d PDU E -2
 H36 H 0.9922 0.5958 0.5826 0.050 Uiso 0.50 1 calc PR E -2
 C37 C 1.0263(8) 0.6827(9) 0.4723(5) 0.0485(17) Uani 0.50 1 d PDU E -2
 H37 H 1.0341 0.7569 0.4835 0.058 Uiso 0.50 1 calc PR E -2
 C38 C 1.0404(15) 0.6760(12) 0.3962(6) 0.050(2) Uani 0.50 1 d PDU E -2
 H38 H 1.0552 0.7453 0.3554 0.060 Uiso 0.50 1 calc PR E -2
 C39 C 1.0325(8) 0.5651(9) 0.3816(5) 0.0524(19) Uani 0.50 1 d PDU E -2
 H39 H 1.0454 0.5559 0.3305 0.063 Uiso 0.50 1 calc PR E -2
 C40 C 1.0058(11) 0.4680(11) 0.4412(5) 0.047(2) Uani 0.50 1 d PDU E -2
 H40 H 0.9983 0.3939 0.4296 0.057 Uiso 0.50 1 calc PR E -2
 C41 C 0.9894(10) 0.4746(9) 0.5187(5) 0.0483(19) Uani 0.50 1 d PDU E -2
 C42 C 0.9612(17) 0.3722(12) 0.5813(8) 0.056(3) Uani 0.50 1 d PDU E -2
 H42G H 0.9923 0.3719 0.6321 0.084 Uiso 0.50 1 calc PR E -2
 H42H H 1.0152 0.2818 0.5746 0.084 Uiso 0.50 1 calc PR E -2
 H42I H 0.8573 0.3940 0.5795 0.084 Uiso 0.50 1 calc PR E -2
 C36B C 0.8392(10) 1.0668(12) 0.3860(6) 0.073(3) Uani 0.351(5) 1 d PGDU F -3
 H36B H 0.9371 1.0519 0.3942 0.088 Uiso 0.351(5) 1 calc PRD F -3
 C37B C 0.7765(12) 1.1129(13) 0.3101(5) 0.062(4) Uani 0.351(5) 1 d PGDU F -3
 H37B H 0.8316 1.1295 0.2665 0.074 Uiso 0.351(5) 1 calc PRD F -3
 C38B C 0.6332(13) 1.1346(12) 0.2980(4) 0.057(3) Uani 0.351(5) 1 d PGDU F -3
 H38B H 0.5904 1.1662 0.2461 0.069 Uiso 0.351(5) 1 calc PRD F -3
 C39B C 0.5527(10) 1.1103(9) 0.3617(6) 0.061(3) Uani 0.351(5) 1 d PGDU F -3
 H39B H 0.4547 1.1252 0.3535 0.074 Uiso 0.351(5) 1 calc PRD F -3
 C40B C 0.6153(11) 1.0642(10) 0.4376(5) 0.067(3) Uani 0.351(5) 1 d PGDU F -3
 H40B H 0.5603 1.0476 0.4812 0.080 Uiso 0.351(5) 1 calc PRD F -3
 C41B C 0.7586(11) 1.0424(11) 0.4497(5) 0.066(3) Uani 0.351(5) 1 d PGDU F -3
 C42B C 0.8199(19) 1.003(2) 0.5261(9) 0.107(7) Uani 0.351(5) 1 d PDU F -3
 H42D H 0.9193 0.9329 0.5309 0.161 Uiso 0.351(5) 1 calc PRD F -3
 H42E H 0.7622 0.9646 0.5637 0.161 Uiso 0.351(5) 1 calc PRD F -3
 H42F H 0.8209 1.0823 0.5372 0.161 Uiso 0.351(5) 1 calc PRD F -3
 C36A C -0.032(2) 0.984(3) 0.5410(12) 0.035(4) Uani 0.149(5) 1 d PGDU F -4
 H36A H -0.1258 0.9893 0.5309 0.043 Uiso 0.149(5) 1 calc PR F -4
 C37A C 0.021(3) 0.950(3) 0.6176(11) 0.047(4) Uani 0.149(5) 1 d PGDU F -4
 H37A H -0.0364 0.9332 0.6600 0.056 Uiso 0.149(5) 1 calc PR F -4
 C38A C 0.158(3) 0.942(3) 0.6323(11) 0.054(4) Uani 0.149(5) 1 d PGDU F -4
 H38A H 0.1941 0.9195 0.6847 0.065 Uiso 0.149(5) 1 calc PR F -4
 C39A C 0.242(2) 0.968(3) 0.5703(14) 0.055(4) Uani 0.149(5) 1 d PGDU F -4
 H39A H 0.3353 0.9620 0.5804 0.066 Uiso 0.149(5) 1 calc PR F -4
 C40A C 0.189(2) 1.001(3) 0.4937(12) 0.054(4) Uani 0.149(5) 1 d PGDU F -4
 H40A H 0.2460 1.0181 0.4513 0.065 Uiso 0.149(5) 1 calc PR F -4
 C41A C 0.052(3) 1.009(4) 0.4790(10) 0.049(4) Uani 0.149(5) 1 d PGDU F -4
 C42A C -0.006(3) 1.048(3) 0.4006(13) 0.041(6) Uani 0.149(5) 1 d PDU F -4
 H42A H -0.0728 1.0062 0.3995 0.062 Uiso 0.149(5) 1 calc PR F -4
 H42B H 0.0737 1.0175 0.3675 0.062 Uiso 0.149(5) 1 calc PR F -4
 H42C H -0.0574 1.1481 0.3810 0.062 Uiso 0.149(5) 1 calc PR F -4
 P1 P 0.13783(9) 0.86798(8) 0.14860(5) 0.0318(3) Uani 1 1 d D . .
 F1 F 0.2155(2) 0.7669(3) 0.09848(15) 0.0581(7) Uani 1 1 d D . .
 F2 F 0.0670(4) 0.9707(3) 0.19756(17) 0.0812(9) Uani 1 1 d D . .
 F3 F 0.2796(3) 0.7926(2) 0.20840(13) 0.0542(6) Uani 1 1 d D . .
 F4 F 0.2040(3) 0.9701(3) 0.09673(15) 0.0623(7) Uani 1 1 d D . .
 F5 F -0.0025(2) 0.9411(2) 0.08902(13) 0.0470(6) Uani 1 1 d D . .
 F6 F 0.0754(3) 0.7649(3) 0.19977(17) 0.0796(9) Uani 1 1 d D . .
 P2 P 0.90220(13) 0.63907(14) 0.77860(7) 0.0606(4) Uani 1 1 d D . .
 F7 F 0.9529(11) 0.6767(7) 0.6951(3) 0.122(4) Uani 0.642(6) 1 d PDU G 1
 F8 F 0.8513(6) 0.6236(7) 0.8682(3) 0.100(2) Uani 0.642(6) 1 d PDU G 1
 F9 F 0.7366(7) 0.7522(9) 0.7517(7) 0.177(5) Uani 0.642(6) 1 d PDU G 1
 F10 F 0.9321(7) 0.7648(5) 0.7922(3) 0.092(2) Uani 0.642(6) 1 d PDU G 1
 F11 F 1.0552(4) 0.5389(6) 0.8117(4) 0.0737(18) Uani 0.642(6) 1 d PDU G 1
 F12 F 0.8505(13) 0.5338(11) 0.7727(9) 0.150(6) Uani 0.642(6) 1 d PDU G 1
 F7A F 1.0408(8) 0.4848(8) 0.7548(7) 0.085(3) Uani 0.358(6) 1 d PDU G 2
 F8A F 0.8003(13) 0.7460(11) 0.7935(10) 0.125(6) Uani 0.358(6) 1 d PDU G 2
 F9A F 0.8301(10) 0.6551(13) 0.6943(6) 0.089(3) Uani 0.358(6) 1 d PDU G 2
 F10A F 1.0034(9) 0.7019(9) 0.7297(8) 0.092(4) Uani 0.358(6) 1 d PDU G 2
 F11A F 1.0150(13) 0.5679(13) 0.8520(7) 0.090(4) Uani 0.358(6) 1 d PDU G 2
 F12A F 0.8453(15) 0.5260(14) 0.8134(9) 0.076(4) Uani 0.358(6) 1 d PDU G 2
 N3 N 0.7192(3) 0.7701(3) 0.04382(18) 0.0417(7) Uani 1 1 d . . .
 C34 C 0.8364(4) 0.7389(4) 0.0283(2) 0.0345(8) Uani 1 1 d . . .
 C35 C 0.9849(4) 0.7019(5) 0.0068(3) 0.0512(10) Uani 1 1 d . . .
 H35A H 0.9913 0.6917 -0.0458 0.077 Uiso 1 1 calc R . .
 H35B H 1.0481 0.6152 0.0447 0.077 Uiso 1 1 calc R . .
 H35C H 1.0156 0.7738 0.0071 0.077 Uiso 1 1 calc R . .

loop_
  _atom_site_aniso_label
  _atom_site_aniso_U_11
  _atom_site_aniso_U_22
  _atom_site_aniso_U_33
  _atom_site_aniso_U_23
  _atom_site_aniso_U_13
  _atom_site_aniso_U_12
 N1 0.0327(14) 0.0255(13) 0.0264(14) -0.0096(11) 0.0055(11) -0.0112(11)
 N2 0.0250(13) 0.0241(13) 0.0269(13) -0.0080(11) 0.0063(10) -0.0113(11)
 C1 0.0288(16) 0.0265(16) 0.0251(16) -0.0019(13) 0.0049(13) -0.0125(13)
 C2 0.0276(16) 0.0423(19) 0.0301(17) -0.0116(15) 0.0044(13) -0.0176(15)
 C3 0.0299(17) 0.051(2) 0.0323(18) -0.0142(16) 0.0085(14) -0.0243(16)
 C4 0.0286(16) 0.0259(16) 0.0288(16) -0.0117(13) 0.0070(13) -0.0131(13)
 C5 0.0290(17) 0.0361(18) 0.0289(17) -0.0075(14) 0.0019(13) -0.0152(14)
 C6 0.0260(16) 0.0318(17) 0.0353(18) -0.0089(14) 0.0069(13) -0.0153(14)
 C7 0.0305(16) 0.0246(15) 0.0285(16) -0.0099(13) 0.0075(13) -0.0138(13)
 C8 0.0237(17) 0.064(3) 0.033(2) 0.0122(18) -0.0006(14) -0.0089(17)
 C9 0.0240(18) 0.062(3) 0.039(2) 0.0113(19) 0.0061(15) -0.0104(17)
 C10 0.0303(16) 0.0224(15) 0.0270(16) -0.0104(13) 0.0058(13) -0.0102(13)
 C11 0.049(2) 0.083(3) 0.0230(17) -0.0102(18) 0.0020(15) -0.044(2)
 C12 0.050(2) 0.100(4) 0.0307(19) -0.013(2) 0.0080(17) -0.057(3)
 C13 0.0326(17) 0.0234(15) 0.0283(16) -0.0110(13) 0.0061(13) -0.0125(13)
 C14 0.0301(17) 0.0332(18) 0.0293(17) -0.0043(14) 0.0051(14) -0.0054(14)
 C15 0.0297(17) 0.0364(18) 0.0312(18) -0.0068(15) 0.0075(14) -0.0092(15)
 C16 0.0307(17) 0.0321(17) 0.0312(17) -0.0069(14) -0.0018(13) -0.0142(14)
 C17 0.0285(16) 0.0341(18) 0.0327(17) -0.0080(14) 0.0028(13) -0.0165(14)
 C18 0.0372(18) 0.0299(17) 0.0231(16) -0.0061(13) 0.0072(13) -0.0131(14)
 C19 0.0326(17) 0.0282(16) 0.0180(14) -0.0035(12) 0.0075(12) -0.0119(14)
 C20 0.0299(16) 0.0314(17) 0.0220(15) -0.0023(13) 0.0020(12) -0.0144(14)
 C21 0.0258(15) 0.0249(16) 0.0234(15) -0.0026(12) 0.0043(12) -0.0071(13)
 C22 0.0283(16) 0.0251(15) 0.0207(15) -0.0015(12) 0.0071(12) -0.0120(13)
 C23 0.0276(17) 0.0359(18) 0.0328(17) -0.0091(14) 0.0056(13) -0.0144(15)
 C24 0.0270(17) 0.0329(18) 0.0345(18) -0.0106(14) 0.0098(14) -0.0092(14)
 C25 0.052(5) 0.053(5) 0.049(4) -0.007(4) 0.012(4) -0.024(4)
 C26 0.058(4) 0.047(4) 0.045(3) -0.002(3) 0.003(3) -0.021(3)
 C27 0.063(4) 0.034(4) 0.035(4) -0.007(3) 0.008(3) -0.030(3)
 C28 0.053(3) 0.029(3) 0.035(3) -0.008(3) 0.003(3) -0.016(3)
 C29 0.053(3) 0.016(3) 0.028(3) -0.011(2) 0.004(3) -0.010(3)
 C30 0.062(4) 0.025(3) 0.026(3) -0.011(3) 0.010(3) -0.017(3)
 C31 0.071(4) 0.023(3) 0.028(3) -0.009(3) 0.005(3) -0.018(3)
 C32 0.072(5) 0.030(3) 0.036(3) -0.014(3) 0.010(4) -0.024(4)
 C33 0.082(5) 0.031(4) 0.041(4) -0.017(3) 0.031(4) -0.019(4)
 C36 0.020(3) 0.050(5) 0.052(5) -0.028(4) -0.003(4) -0.003(4)
 C37 0.028(3) 0.052(4) 0.065(4) -0.024(4) -0.003(3) -0.010(3)
 C38 0.026(4) 0.055(6) 0.056(5) -0.013(4) -0.003(4) -0.008(5)
 C39 0.029(3) 0.064(5) 0.050(4) -0.026(4) -0.002(3) 0.002(3)
 C40 0.025(4) 0.054(5) 0.064(5) -0.036(4) -0.002(4) -0.005(4)
 C41 0.026(3) 0.054(5) 0.060(5) -0.025(4) -0.002(4) -0.006(3)
 C42 0.037(5) 0.050(7) 0.078(8) -0.025(6) 0.006(6) -0.012(6)
 C36B 0.105(6) 0.045(5) 0.055(5) -0.017(5) 0.017(5) -0.017(5)
 C37B 0.094(7) 0.036(5) 0.046(4) -0.013(4) 0.020(6) -0.018(6)
 C38B 0.091(6) 0.029(4) 0.048(5) -0.016(4) 0.016(5) -0.020(5)
 C39B 0.089(5) 0.035(4) 0.056(5) -0.018(4) 0.010(4) -0.020(4)
 C40B 0.099(5) 0.036(4) 0.053(5) -0.014(4) 0.019(4) -0.019(5)
 C41B 0.106(6) 0.042(5) 0.039(5) -0.017(5) 0.012(5) -0.016(5)
 C42B 0.147(13) 0.089(11) 0.053(7) -0.030(9) 0.002(8) -0.012(11)
 C36A 0.056(6) 0.028(6) 0.024(6) -0.019(6) 0.005(5) -0.011(5)
 C37A 0.058(6) 0.044(6) 0.036(6) -0.012(6) 0.003(6) -0.019(6)
 C38A 0.061(6) 0.052(6) 0.043(6) -0.011(6) 0.003(5) -0.019(6)
 C39A 0.065(6) 0.046(6) 0.048(6) -0.010(6) 0.009(5) -0.020(6)
 C40A 0.062(5) 0.042(5) 0.047(5) -0.002(5) 0.006(5) -0.018(5)
 C41A 0.059(6) 0.035(6) 0.041(6) -0.005(6) 0.007(5) -0.012(6)
 C42A 0.067(13) 0.022(10) 0.027(9) -0.010(9) 0.014(8) -0.011(11)
 P1 0.0343(5) 0.0284(5) 0.0293(5) -0.0095(4) 0.0040(4) -0.0094(4)
 F1 0.0405(12) 0.0592(15) 0.0695(16) -0.0419(13) -0.0124(11) 0.0025(11)
 F2 0.092(2) 0.0711(19) 0.0681(18) -0.0465(16) 0.0094(16) -0.0044(16)
 F3 0.0671(15) 0.0424(13) 0.0482(13) -0.0120(10) -0.0218(11) -0.0157(11)
 F4 0.0701(17) 0.0674(16) 0.0552(15) -0.0025(12) 0.0000(12) -0.0448(14)
 F5 0.0318(11) 0.0443(12) 0.0517(13) -0.0107(10) 0.0000(9) -0.0053(9)
 F6 0.085(2) 0.081(2) 0.0679(18) 0.0147(15) 0.0005(15) -0.0550(17)
 P2 0.0489(7) 0.0766(9) 0.0584(7) -0.0017(6) -0.0106(5) -0.0393(6)
 F7 0.231(11) 0.089(4) 0.042(3) -0.021(3) -0.006(4) -0.060(5)
 F8 0.086(4) 0.120(5) 0.094(4) -0.033(4) 0.046(3) -0.047(4)
 F9 0.108(6) 0.107(6) 0.264(11) -0.077(6) -0.116(7) 0.038(4)
 F10 0.141(5) 0.079(3) 0.092(4) -0.046(3) 0.027(3) -0.067(4)
 F11 0.031(2) 0.078(3) 0.097(5) -0.021(3) 0.008(2) -0.013(2)
 F12 0.097(6) 0.106(8) 0.295(18) -0.101(11) -0.037(9) -0.052(5)
 F7A 0.056(5) 0.066(5) 0.147(9) -0.056(6) 0.037(5) -0.025(4)
 F8A 0.089(8) 0.077(7) 0.229(17) -0.122(10) 0.069(9) -0.008(6)
 F9A 0.070(6) 0.112(8) 0.075(6) -0.032(6) -0.025(5) -0.021(6)
 F10A 0.054(5) 0.056(5) 0.136(10) 0.008(6) 0.029(6) -0.023(4)
 F11A 0.086(8) 0.097(8) 0.092(8) -0.010(6) -0.021(6) -0.051(7)
 F12A 0.039(5) 0.066(7) 0.123(10) -0.003(6) -0.016(5) -0.035(5)
 N3 0.0417(19) 0.0450(18) 0.0410(17) -0.0112(14) 0.0023(14) -0.0215(15)
 C34 0.041(2) 0.0354(18) 0.0315(18) -0.0071(14) -0.0005(15) -0.0218(16)
 C35 0.041(2) 0.059(3) 0.058(3) -0.020(2) 0.0071(19) -0.024(2)

_geom_special_details
;
 All esds (except the esd in the dihedral angle between two l.s. planes) 
 are estimated using the full covariance matrix.  The cell esds are taken 
 into account individually in the estimation of esds in distances, angles 
 and torsion angles; correlations between esds in cell parameters are only 
 used when they are defined by crystal symmetry.  An approximate (isotropic) 
 treatment of cell esds is used for estimating esds involving l.s. planes. 
;
loop_
  _geom_bond_atom_site_label_1
  _geom_bond_atom_site_label_2
  _geom_bond_distance
  _geom_bond_site_symmetry_2
  _geom_bond_publ_flag
 N1 C15 1.343(4) . ?
 N1 C16 1.345(4) . ?
 N1 C18 1.498(4) . ?
 N2 C1 1.501(4) . ?
 N2 C2 1.343(4) . ?
 N2 C6 1.343(4) . ?
 C1 H1A 0.9900 . ?
 C1 H1B 0.9900 . ?
 C1 C22 1.509(5) 2_676 ?
 C2 H2 0.9500 . ?
 C2 C3 1.371(5) . ?
 C3 H3 0.9500 . ?
 C3 C4 1.388(5) . ?
 C4 C5 1.399(5) . ?
 C4 C7 1.482(4) . ?
 C5 H5 0.9500 . ?
 C5 C6 1.376(5) . ?
 C6 H6 0.9500 . ?
 C7 C8 1.379(5) . ?
 C7 C12 1.372(5) . ?
 C8 H8 0.9500 . ?
 C8 C9 1.375(5) . ?
 C9 H9 0.9500 . ?
 C9 C10 1.383(5) . ?
 C10 C11 1.379(5) . ?
 C10 C13 1.480(4) . ?
 C11 H11 0.9500 . ?
 C11 C12 1.381(5) . ?
 C12 H12 0.9500 . ?
 C13 C14 1.401(5) . ?
 C13 C17 1.392(5) . ?
 C14 H14 0.9500 . ?
 C14 C15 1.364(5) . ?
 C15 H15 0.9500 . ?
 C16 H16 0.9500 . ?
 C16 C17 1.369(5) . ?
 C17 H17 0.9500 . ?
 C18 H18A 0.9900 . ?
 C18 H18B 0.9900 . ?
 C18 C19 1.510(5) . ?
 C19 C20 1.393(5) . ?
 C19 C24 1.387(5) . ?
 C20 H20 0.9500 . ?
 C20 C21 1.386(5) . ?
 C21 H21 0.9500 . ?
 C21 C22 1.392(5) . ?
 C22 C1 1.509(5) 2_676 ?
 C22 C23 1.392(5) . ?
 C23 H23 0.9500 . ?
 C23 C24 1.386(5) . ?
 C24 H24 0.9500 . ?
 C25 H25 0.9500 . ?
 C25 C26 1.370(12) . ?
 C25 C33 1.440(15) 2_676 ?
 C26 H26 0.9500 . ?
 C26 C27 1.450(13) . ?
 C27 C28 1.354(11) . ?
 C27 C31 1.443(12) 2_676 ?
 C28 H28 0.9500 . ?
 C28 C29 1.392(11) . ?
 C29 C29 1.449(14) 2_676 ?
 C29 C30 1.391(10) . ?
 C30 H30 0.9500 . ?
 C30 C31 1.380(12) . ?
 C31 C27 1.443(12) 2_676 ?
 C31 C32 1.449(12) . ?
 C32 H32 0.9500 . ?
 C32 C33 1.322(15) . ?
 C33 C25 1.440(15) 2_676 ?
 C33 H33 0.9500 . ?
 C36 H36 0.9500 . ?
 C36 C37 1.360(10) . ?
 C36 C41 1.400(11) . ?
 C37 H37 0.9500 . ?
 C37 C38 1.385(11) . ?
 C38 H38 0.9500 . ?
 C38 C39 1.384(11) . ?
 C39 H39 0.9500 . ?
 C39 C40 1.381(11) . ?
 C40 H40 0.9500 . ?
 C40 C41 1.412(11) . ?
 C41 C42 1.453(12) . ?
 C42 H42G 0.9800 . ?
 C42 H42H 0.9800 . ?
 C42 H42I 0.9800 . ?
 C36B H36B 0.9500 . ?
 C36B C37B 1.3900 . ?
 C36B C41B 1.3900 . ?
 C37B H37B 0.9500 . ?
 C37B C38B 1.3900 . ?
 C38B H38B 0.9500 . ?
 C38B C39B 1.3900 . ?
 C39B H39B 0.9500 . ?
 C39B C40B 1.3900 . ?
 C40B H40B 0.9500 . ?
 C40B C41B 1.3900 . ?
 C41B C42B 1.402(15) . ?
 C42B H42D 0.9800 . ?
 C42B H42E 0.9800 . ?
 C42B H42F 0.9800 . ?
 C36A H36A 0.9500 . ?
 C36A C37A 1.3900 . ?
 C36A C41A 1.3900 . ?
 C37A H37A 0.9500 . ?
 C37A C38A 1.3900 . ?
 C38A H38A 0.9500 . ?
 C38A C39A 1.3900 . ?
 C39A H39A 0.9500 . ?
 C39A C40A 1.3900 . ?
 C40A H40A 0.9500 . ?
 C40A C41A 1.3900 . ?
 C41A C42A 1.422(16) . ?
 C42A H42A 0.9800 . ?
 C42A H42B 0.9800 . ?
 C42A H42C 0.9800 . ?
 P1 F1 1.590(2) . ?
 P1 F2 1.577(2) . ?
 P1 F3 1.604(2) . ?
 P1 F4 1.594(2) . ?
 P1 F5 1.592(2) . ?
 P1 F6 1.572(3) . ?
 P2 F7 1.545(5) . ?
 P2 F8 1.639(5) . ?
 P2 F9 1.626(5) . ?
 P2 F10 1.651(4) . ?
 P2 F11 1.517(4) . ?
 P2 F12 1.510(6) . ?
 P2 F7A 1.884(8) . ?
 P2 F8A 1.316(7) . ?
 P2 F9A 1.647(8) . ?
 P2 F10A 1.559(8) . ?
 P2 F11A 1.572(10) . ?
 P2 F12A 1.554(11) . ?
 N3 C34 1.136(5) . ?
 C34 C35 1.450(5) . ?
 C35 H35A 0.9800 . ?
 C35 H35B 0.9800 . ?
 C35 H35C 0.9800 . ?

loop_
  _geom_angle_atom_site_label_1
  _geom_angle_atom_site_label_2
  _geom_angle_atom_site_label_3
  _geom_angle
  _geom_angle_site_symmetry_1
  _geom_angle_site_symmetry_3
  _geom_angle_publ_flag
 C15 N1 C16 119.8(3) . . ?
 C15 N1 C18 120.2(3) . . ?
 C16 N1 C18 119.8(3) . . ?
 C2 N2 C1 118.7(3) . . ?
 C6 N2 C1 121.0(3) . . ?
 C6 N2 C2 120.1(3) . . ?
 N2 C1 H1A 109.9 . . ?
 N2 C1 H1B 109.9 . . ?
 N2 C1 C22 108.9(2) . 2_676 ?
 H1A C1 H1B 108.3 . . ?
 C22 C1 H1A 109.9 2_676 . ?
 C22 C1 H1B 109.9 2_676 . ?
 N2 C2 H2 119.7 . . ?
 N2 C2 C3 120.6(3) . . ?
 C3 C2 H2 119.7 . . ?
 C2 C3 H3 119.2 . . ?
 C2 C3 C4 121.5(3) . . ?
 C4 C3 H3 119.2 . . ?
 C3 C4 C5 116.1(3) . . ?
 C3 C4 C7 121.1(3) . . ?
 C5 C4 C7 122.8(3) . . ?
 C4 C5 H5 119.6 . . ?
 C6 C5 C4 120.8(3) . . ?
 C6 C5 H5 119.6 . . ?
 N2 C6 C5 120.8(3) . . ?
 N2 C6 H6 119.6 . . ?
 C5 C6 H6 119.6 . . ?
 C8 C7 C4 120.2(3) . . ?
 C12 C7 C4 122.9(3) . . ?
 C12 C7 C8 116.8(3) . . ?
 C7 C8 H8 119.2 . . ?
 C9 C8 C7 121.6(4) . . ?
 C9 C8 H8 119.2 . . ?
 C8 C9 H9 119.2 . . ?
 C8 C9 C10 121.5(3) . . ?
 C10 C9 H9 119.2 . . ?
 C9 C10 C13 120.0(3) . . ?
 C11 C10 C9 116.8(3) . . ?
 C11 C10 C13 123.1(3) . . ?
 C10 C11 H11 119.4 . . ?
 C10 C11 C12 121.3(3) . . ?
 C12 C11 H11 119.4 . . ?
 C7 C12 C11 121.9(3) . . ?
 C7 C12 H12 119.1 . . ?
 C11 C12 H12 119.1 . . ?
 C14 C13 C10 121.9(3) . . ?
 C17 C13 C10 121.4(3) . . ?
 C17 C13 C14 116.6(3) . . ?
 C13 C14 H14 119.5 . . ?
 C15 C14 C13 121.0(3) . . ?
 C15 C14 H14 119.5 . . ?
 N1 C15 C14 120.8(3) . . ?
 N1 C15 H15 119.6 . . ?
 C14 C15 H15 119.6 . . ?
 N1 C16 H16 119.2 . . ?
 N1 C16 C17 121.5(3) . . ?
 C17 C16 H16 119.2 . . ?
 C13 C17 H17 119.9 . . ?
 C16 C17 C13 120.3(3) . . ?
 C16 C17 H17 119.9 . . ?
 N1 C18 H18A 110.1 . . ?
 N1 C18 H18B 110.1 . . ?
 N1 C18 C19 108.1(2) . . ?
 H18A C18 H18B 108.4 . . ?
 C19 C18 H18A 110.1 . . ?
 C19 C18 H18B 110.1 . . ?
 C20 C19 C18 120.6(3) . . ?
 C24 C19 C18 119.8(3) . . ?
 C24 C19 C20 119.4(3) . . ?
 C19 C20 H20 119.9 . . ?
 C21 C20 C19 120.2(3) . . ?
 C21 C20 H20 119.9 . . ?
 C20 C21 H21 119.8 . . ?
 C20 C21 C22 120.3(3) . . ?
 C22 C21 H21 119.8 . . ?
 C21 C22 C1 120.8(3) . 2_676 ?
 C21 C22 C23 119.2(3) . . ?
 C23 C22 C1 119.9(3) . 2_676 ?
 C22 C23 H23 119.8 . . ?
 C24 C23 C22 120.4(3) . . ?
 C24 C23 H23 119.8 . . ?
 C19 C24 H24 119.8 . . ?
 C23 C24 C19 120.3(3) . . ?
 C23 C24 H24 119.8 . . ?
 C26 C25 H25 119.8 . . ?
 C26 C25 C33 120.3(10) . 2_676 ?
 C33 C25 H25 119.8 2_676 . ?
 C25 C26 H26 119.0 . . ?
 C25 C26 C27 121.9(9) . . ?
 C27 C26 H26 119.0 . . ?
 C28 C27 C26 122.4(8) . . ?
 C28 C27 C31 120.8(8) . 2_676 ?
 C31 C27 C26 116.7(7) 2_676 . ?
 C27 C28 H28 119.1 . . ?
 C27 C28 C29 121.7(7) . . ?
 C29 C28 H28 119.1 . . ?
 C28 C29 C29 118.0(8) . 2_676 ?
 C30 C29 C28 122.2(7) . . ?
 C30 C29 C29 119.8(9) . 2_676 ?
 C29 C30 H30 119.4 . . ?
 C31 C30 C29 121.1(7) . . ?
 C31 C30 H30 119.4 . . ?
 C27 C31 C32 118.2(8) 2_676 . ?
 C30 C31 C27 118.4(7) . 2_676 ?
 C30 C31 C32 123.4(8) . . ?
 C31 C32 H32 118.3 . . ?
 C33 C32 C31 123.5(10) . . ?
 C33 C32 H32 118.3 . . ?
 C25 C33 H33 120.4 2_676 . ?
 C32 C33 C25 119.2(9) . 2_676 ?
 C32 C33 H33 120.4 . . ?
 C37 C36 H36 119.2 . . ?
 C37 C36 C41 121.7(8) . . ?
 C41 C36 H36 119.2 . . ?
 C36 C37 H37 118.9 . . ?
 C36 C37 C38 122.2(9) . . ?
 C38 C37 H37 118.9 . . ?
 C37 C38 H38 121.0 . . ?
 C39 C38 C37 117.9(10) . . ?
 C39 C38 H38 121.0 . . ?
 C38 C39 H39 119.9 . . ?
 C40 C39 C38 120.1(9) . . ?
 C40 C39 H39 119.9 . . ?
 C39 C40 H40 118.8 . . ?
 C39 C40 C41 122.4(9) . . ?
 C41 C40 H40 118.8 . . ?
 C36 C41 C40 115.6(7) . . ?
 C36 C41 C42 122.1(9) . . ?
 C40 C41 C42 122.3(10) . . ?
 C41 C42 H42G 109.5 . . ?
 C41 C42 H42H 109.5 . . ?
 C41 C42 H42I 109.5 . . ?
 H42G C42 H42H 109.5 . . ?
 H42G C42 H42I 109.5 . . ?
 H42H C42 H42I 109.5 . . ?
 C37B C36B H36B 120.0 . . ?
 C37B C36B C41B 120.0 . . ?
 C41B C36B H36B 120.0 . . ?
 C36B C37B H37B 120.0 . . ?
 C36B C37B C38B 120.0 . . ?
 C38B C37B H37B 120.0 . . ?
 C37B C38B H38B 120.0 . . ?
 C39B C38B C37B 120.0 . . ?
 C39B C38B H38B 120.0 . . ?
 C38B C39B H39B 120.0 . . ?
 C40B C39B C38B 120.0 . . ?
 C40B C39B H39B 120.0 . . ?
 C39B C40B H40B 120.0 . . ?
 C39B C40B C41B 120.0 . . ?
 C41B C40B H40B 120.0 . . ?
 C36B C41B C42B 119.8(4) . . ?
 C40B C41B C36B 120.0 . . ?
 C40B C41B C42B 120.1(4) . . ?
 C41B C42B H42D 109.5 . . ?
 C41B C42B H42E 109.5 . . ?
 C41B C42B H42F 109.5 . . ?
 H42D C42B H42E 109.5 . . ?
 H42D C42B H42F 109.5 . . ?
 H42E C42B H42F 109.5 . . ?
 C37A C36A H36A 120.0 . . ?
 C37A C36A C41A 120.0 . . ?
 C41A C36A H36A 120.0 . . ?
 C36A C37A H37A 120.0 . . ?
 C36A C37A C38A 120.0 . . ?
 C38A C37A H37A 120.0 . . ?
 C37A C38A H38A 120.0 . . ?
 C39A C38A C37A 120.0 . . ?
 C39A C38A H38A 120.0 . . ?
 C38A C39A H39A 120.0 . . ?
 C40A C39A C38A 120.0 . . ?
 C40A C39A H39A 120.0 . . ?
 C39A C40A H40A 120.0 . . ?
 C39A C40A C41A 120.0 . . ?
 C41A C40A H40A 120.0 . . ?
 C36A C41A C42A 119.6(14) . . ?
 C40A C41A C36A 120.0 . . ?
 C40A C41A C42A 120.3(15) . . ?
 C41A C42A H42A 109.5 . . ?
 C41A C42A H42B 109.5 . . ?
 C41A C42A H42C 109.5 . . ?
 H42A C42A H42B 109.5 . . ?
 H42A C42A H42C 109.5 . . ?
 H42B C42A H42C 109.5 . . ?
 F1 P1 F3 89.50(12) . . ?
 F1 P1 F4 89.02(15) . . ?
 F1 P1 F5 89.88(12) . . ?
 F2 P1 F1 177.18(18) . . ?
 F2 P1 F3 89.09(15) . . ?
 F2 P1 F4 88.53(17) . . ?
 F2 P1 F5 91.55(15) . . ?
 F4 P1 F3 89.71(14) . . ?
 F5 P1 F3 179.28(13) . . ?
 F5 P1 F4 90.64(13) . . ?
 F6 P1 F1 90.15(17) . . ?
 F6 P1 F2 92.29(19) . . ?
 F6 P1 F3 89.57(15) . . ?
 F6 P1 F4 178.90(17) . . ?
 F6 P1 F5 90.08(15) . . ?
 F7 P2 F8 169.7(4) . . ?
 F7 P2 F9 93.0(5) . . ?
 F7 P2 F10 87.6(3) . . ?
 F7 P2 F7A 67.8(4) . . ?
 F7 P2 F9A 50.5(5) . . ?
 F7 P2 F10A 37.5(5) . . ?
 F7 P2 F11A 120.2(6) . . ?
 F7 P2 F12A 125.9(7) . . ?
 F8 P2 F10 82.1(3) . . ?
 F8 P2 F7A 119.5(4) . . ?
 F8 P2 F9A 135.5(5) . . ?
 F9 P2 F8 85.3(5) . . ?
 F9 P2 F10 85.5(4) . . ?
 F9 P2 F7A 139.9(5) . . ?
 F9 P2 F9A 62.3(5) . . ?
 F10 P2 F7A 126.2(4) . . ?
 F11 P2 F7 91.7(4) . . ?
 F11 P2 F8 89.4(3) . . ?
 F11 P2 F9 173.6(5) . . ?
 F11 P2 F10 90.3(3) . . ?
 F11 P2 F7A 46.3(4) . . ?
 F11 P2 F9A 124.1(5) . . ?
 F11 P2 F10A 74.5(4) . . ?
 F11 P2 F11A 33.5(4) . . ?
 F11 P2 F12A 91.0(6) . . ?
 F12 P2 F7 99.4(6) . . ?
 F12 P2 F8 90.7(6) . . ?
 F12 P2 F9 87.1(6) . . ?
 F12 P2 F10 170.0(6) . . ?
 F12 P2 F11 96.5(5) . . ?
 F12 P2 F7A 63.5(6) . . ?
 F12 P2 F9A 60.1(7) . . ?
 F12 P2 F10A 133.4(8) . . ?
 F12 P2 F11A 106.5(7) . . ?
 F12 P2 F12A 26.8(8) . . ?
 F8A P2 F7 112.0(8) . . ?
 F8A P2 F8 61.2(7) . . ?
 F8A P2 F9 37.4(7) . . ?
 F8A P2 F10 56.5(6) . . ?
 F8A P2 F11 136.4(8) . . ?
 F8A P2 F12 113.9(8) . . ?
 F8A P2 F7A 177.1(7) . . ?
 F8A P2 F9A 98.7(8) . . ?
 F8A P2 F10A 102.1(7) . . ?
 F8A P2 F11A 105.0(9) . . ?
 F8A P2 F12A 102.3(8) . . ?
 F9A P2 F10 121.4(5) . . ?
 F9A P2 F7A 79.0(5) . . ?
 F10A P2 F8 133.7(6) . . ?
 F10A P2 F9 106.9(6) . . ?
 F10A P2 F10 55.6(5) . . ?
 F10A P2 F7A 79.5(5) . . ?
 F10A P2 F9A 86.9(7) . . ?
 F10A P2 F11A 90.8(6) . . ?
 F11A P2 F8 58.1(6) . . ?
 F11A P2 F9 140.3(7) . . ?
 F11A P2 F10 75.5(5) . . ?
 F11A P2 F7A 77.3(6) . . ?
 F11A P2 F9A 156.2(7) . . ?
 F12A P2 F8 64.3(6) . . ?
 F12A P2 F9 89.9(7) . . ?
 F12A P2 F10 146.4(6) . . ?
 F12A P2 F7A 75.9(6) . . ?
 F12A P2 F9A 84.8(6) . . ?
 F12A P2 F10A 155.1(8) . . ?
 F12A P2 F11A 87.4(6) . . ?
 N3 C34 C35 178.6(4) . . ?
 C34 C35 H35A 109.5 . . ?
 C34 C35 H35B 109.5 . . ?
 C34 C35 H35C 109.5 . . ?
 H35A C35 H35B 109.5 . . ?
 H35A C35 H35C 109.5 . . ?
 H35B C35 H35C 109.5 . . ?

loop_
  _geom_torsion_atom_site_label_1
  _geom_torsion_atom_site_label_2
  _geom_torsion_atom_site_label_3
  _geom_torsion_atom_site_label_4
  _geom_torsion
  _geom_torsion_site_symmetry_1
  _geom_torsion_site_symmetry_2
  _geom_torsion_site_symmetry_3
  _geom_torsion_site_symmetry_4
  _geom_torsion_publ_flag
 N1 C16 C17 C13 -0.8(5) . . . . ?
 N1 C18 C19 C20 -85.0(3) . . . . ?
 N1 C18 C19 C24 90.4(3) . . . . ?
 N2 C2 C3 C4 0.0(5) . . . . ?
 C1 N2 C2 C3 -175.8(3) . . . . ?
 C1 N2 C6 C5 175.9(3) . . . . ?
 C1 C22 C23 C24 172.6(3) 2_676 . . . ?
 C2 N2 C1 C22 69.6(3) . . . 2_676 ?
 C2 N2 C6 C5 0.6(5) . . . . ?
 C2 C3 C4 C5 0.3(5) . . . . ?
 C2 C3 C4 C7 178.7(3) . . . . ?
 C3 C4 C5 C6 -0.1(5) . . . . ?
 C3 C4 C7 C8 1.1(5) . . . . ?
 C3 C4 C7 C12 -177.2(4) . . . . ?
 C4 C5 C6 N2 -0.3(5) . . . . ?
 C4 C7 C8 C9 -176.8(4) . . . . ?
 C4 C7 C12 C11 177.3(4) . . . . ?
 C5 C4 C7 C8 179.4(4) . . . . ?
 C5 C4 C7 C12 1.1(5) . . . . ?
 C6 N2 C1 C22 -105.8(3) . . . 2_676 ?
 C6 N2 C2 C3 -0.4(5) . . . . ?
 C7 C4 C5 C6 -178.5(3) . . . . ?
 C7 C8 C9 C10 -0.4(7) . . . . ?
 C8 C7 C12 C11 -1.1(7) . . . . ?
 C8 C9 C10 C11 -1.6(6) . . . . ?
 C8 C9 C10 C13 176.1(4) . . . . ?
 C9 C10 C11 C12 2.2(6) . . . . ?
 C9 C10 C13 C14 24.3(5) . . . . ?
 C9 C10 C13 C17 -152.3(4) . . . . ?
 C10 C11 C12 C7 -0.9(7) . . . . ?
 C10 C13 C14 C15 -173.7(3) . . . . ?
 C10 C13 C17 C16 174.8(3) . . . . ?
 C11 C10 C13 C14 -158.3(4) . . . . ?
 C11 C10 C13 C17 25.2(5) . . . . ?
 C12 C7 C8 C9 1.7(6) . . . . ?
 C13 C10 C11 C12 -175.4(4) . . . . ?
 C13 C14 C15 N1 -1.5(6) . . . . ?
 C14 C13 C17 C16 -1.9(5) . . . . ?
 C15 N1 C16 C17 2.6(5) . . . . ?
 C15 N1 C18 C19 -94.9(3) . . . . ?
 C16 N1 C15 C14 -1.4(5) . . . . ?
 C16 N1 C18 C19 79.0(4) . . . . ?
 C17 C13 C14 C15 3.0(5) . . . . ?
 C18 N1 C15 C14 172.5(3) . . . . ?
 C18 N1 C16 C17 -171.4(3) . . . . ?
 C18 C19 C20 C21 172.0(3) . . . . ?
 C18 C19 C24 C23 -172.1(3) . . . . ?
 C19 C20 C21 C22 0.2(4) . . . . ?
 C20 C19 C24 C23 3.4(5) . . . . ?
 C20 C21 C22 C1 -172.6(3) . . . 2_676 ?
 C20 C21 C22 C23 2.9(4) . . . . ?
 C21 C22 C23 C24 -2.9(5) . . . . ?
 C22 C23 C24 C19 -0.2(5) . . . . ?
 C24 C19 C20 C21 -3.4(4) . . . . ?
 C25 C26 C27 C28 176.5(9) . . . . ?
 C25 C26 C27 C31 -0.2(13) . . . 2_676 ?
 C26 C27 C28 C29 -177.7(7) . . . . ?
 C27 C28 C29 C29 0.0(11) . . . 2_676 ?
 C27 C28 C29 C30 -179.9(7) . . . . ?
 C27 C31 C32 C33 -1.8(13) 2_676 . . . ?
 C28 C29 C30 C31 179.0(6) . . . . ?
 C29 C29 C30 C31 -1.0(11) 2_676 . . . ?
 C29 C30 C31 C27 2.0(10) . . . 2_676 ?
 C29 C30 C31 C32 -179.3(7) . . . . ?
 C30 C31 C32 C33 179.6(8) . . . . ?
 C31 C27 C28 C29 -1.1(11) 2_676 . . . ?
 C31 C32 C33 C25 -1.5(15) . . . 2_676 ?
 C33 C25 C26 C27 3.6(15) 2_676 . . . ?
 C36 C37 C38 C39 -1.7(16) . . . . ?
 C37 C36 C41 C40 0.6(17) . . . . ?
 C37 C36 C41 C42 -179.3(10) . . . . ?
 C37 C38 C39 C40 2.3(16) . . . . ?
 C38 C39 C40 C41 -1.6(16) . . . . ?
 C39 C40 C41 C36 0.1(17) . . . . ?
 C39 C40 C41 C42 180.0(10) . . . . ?
 C41 C36 C37 C38 0.2(16) . . . . ?
 C36B C37B C38B C39B 0.0 . . . . ?
 C37B C36B C41B C40B 0.0 . . . . ?
 C37B C36B C41B C42B -176.8(10) . . . . ?
 C37B C38B C39B C40B 0.0 . . . . ?
 C38B C39B C40B C41B 0.0 . . . . ?
 C39B C40B C41B C36B 0.0 . . . . ?
 C39B C40B C41B C42B 176.8(10) . . . . ?
 C41B C36B C37B C38B 0.0 . . . . ?
 C36A C37A C38A C39A 0.0 . . . . ?
 C37A C36A C41A C40A 0.0 . . . . ?
 C37A C36A C41A C42A -178(3) . . . . ?
 C37A C38A C39A C40A 0.0 . . . . ?
 C38A C39A C40A C41A 0.0 . . . . ?
 C39A C40A C41A C36A 0.0 . . . . ?
 C39A C40A C41A C42A 178(3) . . . . ?
 C41A C36A C37A C38A 0.0 . . . . ?
